# Supplementary material for: Truncated Class 1 Integron Gene Cassette Arrays Contribute to Antimicrobial Resistance of Diarrheagenic Escherichia coli
Source: PubMed Central journal article supplement (PMC7013361; doi:10.1155/2020/4908189), 2020-01-31
Supplement: 4908189.f1.pdf [file 4908189.f1.pdf]

Supplemental Table 1. Strains tested and accession numbers of DNA sequences deposited in the DDBJ/GenBank/EMBL database

| No. | Strain | Pathogenic type | Serotype | Isolation year | <i>intI1</i> | Gene cassettes       | Accession number | Run ID    |
|-----|--------|-----------------|----------|----------------|--------------|----------------------|------------------|-----------|
| 1   | EA1    | EAEC            | O44      | 2012           | -            | -                    | -                | -         |
| 2   | EA2    | EAEC            | O125     | 2012           | -            | -                    | -                | -         |
| 3   | EA3    | EAEC            | OUT      | 2012           | +            | <i>aadA1</i>         | LC380541         | -         |
| 4   | EA4    | EAEC            | OUT      | 2012           | +            | <i>aadA1</i>         | LC380542         | -         |
| 5   | EA5    | EAEC            | O55      | 2012           | -            | -                    | -                | -         |
| 6   | EA6    | EAEC            | OUT      | 2012           | -            | -                    | -                | -         |
| 7   | EA7    | EAEC            | OUT      | 2012           | +            | <i>dfrA14</i>        | -                | DRR129827 |
| 8   | EA8    | EAEC            | OUT      | 2012           | +            | <i>dfrA5</i>         | LC380543         | -         |
| 9   | EA9    | EAEC            | O153     | 2012           | +            | <i>dfrA1 -aadA1</i>  | LC380544         | -         |
| 10  | EA10   | EAEC            | OUT      | 2012           | +            | <i>dfrA14</i>        | -                | DRR129828 |
| 11  | EA12   | EAEC            | O127     | 2012           | -            | -                    | -                | -         |
| 12  | EA13   | EAEC            | OUT      | 2012           | +            | <i>dfrA17</i>        | LC380545         | -         |
| 13  | EA14   | EAEC            | OUT      | 2012           | +            | <i>dfrA14</i>        | -                | DRR129829 |
| 14  | EA15   | EAEC            | OUT      | 2013           | +            | <i>dfrA14</i>        | -                | DRR129830 |
| 15  | EA20   | EAEC            | O86      | 2013           | +            | <i>aadA1</i>         | LC380546         | -         |
| 16  | EA22   | EAEC            | O111     | 2013           | -            | -                    | -                | -         |
| 17  | EA23   | EAEC            | OUT      | 2013           | -            | -                    | -                | -         |
| 18  | EA24   | EAEC            | O126     | 2013           | -            | -                    | -                | -         |
| 19  | EA25   | EAEC            | OUT      | 2013           | +            | <i>dfrA5</i>         | LC380547         | -         |
| 20  | EA26   | EAEC            | OUT      | 2013           | +            | <i>dfrA5</i>         | LC380548         | -         |
| 21  | EA28   | EAEC            | OUT      | 2013           | -            | -                    | -                | -         |
| 22  | EA29   | EAEC            | O126     | 2013           | -            | -                    | -                | -         |
| 23  | EA36   | EAEC            | O126     | 2013           | -            | -                    | -                | -         |
| 24  | EA37   | EAEC            | OUT      | 2013           | -            | -                    | -                | -         |
| 25  | EA38   | EAEC            | OUT      | 2013           | -            | -                    | -                | -         |
| 26  | EA39   | EAEC            | O86      | 2013           | -            | -                    | -                | -         |
| 27  | EA40   | EAEC            | OUT      | 2013           | -            | -                    | -                | -         |
| 28  | EA41   | EAEC            | OUT      | 2014           | +            | <i>dfrA14</i>        | -                | DRR129831 |
| 29  | EA42   | EAEC            | OUT      | 2014           | -            | -                    | -                | -         |
| 30  | EA43   | EAEC            | OUT      | 2014           | +            | <i>dfrA12 -aadA2</i> | LC380549         | -         |
| 31  | EA44   | EAEC            | OUT      | 2014           | +            | <i>dfrA17</i>        | -                | DRR129832 |
| 32  | EA45   | EAEC            | OUT      | 2014           | -            | -                    | -                | -         |
| 33  | EA46   | EAEC            | OUT      | 2014           | -            | -                    | -                | -         |
| 34  | EA50   | EAEC            | OUT      | 2014           | +            | <i>dfrA17</i>        | -                | DRR129833 |
| 35  | EA51   | EAEC            | OUT      | 2014           | +            | <i>dfrA17</i>        | -                | DRR129834 |
| 36  | EA60   | EAEC            | OUT      | 2014           | -            | -                    | -                | -         |
| 37  | EA61   | EAEC            | OUT      | 2014           | +            | <i>dfrA5</i>         | LC380550         | -         |
| 38  | EA62   | EAEC            | OUT      | 2014           | +            | <i>dfrA5</i>         | LC380551         | -         |
| 39  | EA63   | EAEC            | OUT      | 2014           | +            | <i>dfrA17</i>        | -                | DRR129835 |
| 40  | EA64   | EAEC            | O127     | 2014           | -            | -                    | -                | -         |
| 41  | EP1    | EPEC            | OUT      | 2012           | +            | <i>dfrA17 -aadA5</i> | LC380554         | -         |
| 42  | EP2    | EPEC            | O114     | 2012           | -            | -                    | -                | -         |
| 43  | EP3    | EPEC            | OUT      | 2012           | -            | -                    | -                | -         |
| 44  | EP4    | EPEC            | OUT      | 2012           | -            | -                    | -                | -         |
| 45  | EP5    | EPEC            | OUT      | 2012           | -            | -                    | -                | -         |
| 46  | EP9    | EPEC            | O15      | 2013           | -            | -                    | -                | -         |
| 47  | EP10   | EPEC            | O145     | 2013           | -            | -                    | -                | -         |
| 48  | EP11   | EPEC            | O125     | 2013           | -            | -                    | -                | -         |
| 49  | EP13   | EPEC            | OUT      | 2013           | -            | -                    | -                | -         |
| 50  | EP14   | EPEC            | O124     | 2013           | -            | -                    | -                | -         |
| 51  | EP15   | EPEC            | OUT      | 2013           | -            | -                    | -                | -         |
| 52  | EP16   | EPEC            | O124     | 2013           | -            | -                    | -                | -         |
| 53  | EP17   | EPEC            | O63      | 2013           | -            | -                    | -                | -         |
| 54  | EP18   | EPEC            | OUT      | 2013           | -            | -                    | -                | -         |
| 55  | EP19   | EPEC            | OUT      | 2013           | -            | -                    | -                | -         |
| 56  | EP21   | EPEC            | OUT      | 2013           | -            | -                    | -                | -         |
| 57  | EP23   | EPEC            | OUT      | 2013           | -            | -                    | -                | -         |
| 58  | EP24   | EPEC            | OUT      | 2013           | -            | -                    | -                | -         |
| 59  | EP25   | EPEC            | OUT      | 2013           | -            | -                    | -                | -         |

|     |      |      |      |      |   |                                |          |           |
|-----|------|------|------|------|---|--------------------------------|----------|-----------|
| 60  | EP26 | EPEC | OUT  | 2013 | - | -                              | -        | -         |
| 61  | EP27 | EPEC | OUT  | 2013 | + | <i>dfrA17-aadA5</i>            | LC383355 | -         |
| 62  | EP28 | EPEC | OUT  | 2013 | - | -                              | -        | -         |
| 63  | EP29 | EPEC | OUT  | 2013 | - | -                              | -        | -         |
| 64  | EP30 | EPEC | O55  | 2013 | - | -                              | -        | -         |
| 65  | EP31 | EPEC | OUT  | 2013 | - | -                              | -        | -         |
| 66  | EP32 | EPEC | O164 | 2013 | - | -                              | -        | -         |
| 67  | EP33 | EPEC | OUT  | 2013 | - | -                              | -        | -         |
| 68  | EP34 | EPEC | OUT  | 2013 | - | -                              | -        | -         |
| 69  | EP35 | EPEC | OUT  | 2014 | + | <i>bla<sub>OXA</sub>-aadA1</i> | -        | DRR129836 |
| 70  | EP36 | EPEC | OUT  | 2014 | - | -                              | -        | -         |
| 71  | EP37 | EPEC | OUT  | 2014 | - | -                              | -        | -         |
| 72  | EP38 | EPEC | O167 | 2014 | - | -                              | -        | -         |
| 73  | EP39 | EPEC | OUT  | 2014 | + | <i>dfrA14</i>                  | -        | DRR129837 |
| 74  | EP40 | EPEC | OUT  | 2014 | - | -                              | -        | -         |
| 75  | EP41 | EPEC | OUT  | 2014 | - | -                              | -        | -         |
| 76  | EP42 | EPEC | OUT  | 2014 | + | <i>dfrA1</i>                   | -        | DRR129838 |
| 77  | EP43 | EPEC | OUT  | 2014 | - | -                              | -        | -         |
| 78  | EH1  | STEC | O157 | 2012 | - | -                              | -        | -         |
| 79  | EH2  | STEC | O165 | 2012 | - | -                              | -        | -         |
| 80  | EH3  | STEC | O157 | 2012 | - | -                              | -        | -         |
| 81  | EH4  | STEC | O26  | 2012 | - | -                              | -        | -         |
| 82  | EH5  | STEC | O111 | 2012 | - | -                              | -        | -         |
| 83  | EH6  | STEC | O157 | 2012 | - | -                              | -        | -         |
| 84  | EH7  | STEC | O26  | 2012 | - | -                              | -        | -         |
| 85  | EH8  | STEC | O157 | 2012 | - | -                              | -        | -         |
| 86  | EH9  | STEC | O157 | 2012 | - | -                              | -        | -         |
| 87  | EH10 | STEC | O157 | 2012 | - | -                              | -        | -         |
| 88  | EH11 | STEC | O157 | 2012 | - | -                              | -        | -         |
| 89  | EH12 | STEC | O157 | 2012 | - | -                              | -        | -         |
| 90  | EH13 | STEC | O157 | 2012 | - | -                              | -        | -         |
| 91  | EH14 | STEC | O157 | 2012 | - | -                              | -        | -         |
| 92  | EH15 | STEC | O157 | 2012 | - | -                              | -        | -         |
| 93  | EH16 | STEC | O157 | 2012 | - | -                              | -        | -         |
| 94  | EH17 | STEC | O157 | 2012 | - | -                              | -        | -         |
| 95  | EH18 | STEC | O157 | 2012 | - | -                              | -        | -         |
| 96  | EH19 | STEC | O157 | 2012 | - | -                              | -        | -         |
| 97  | EH20 | STEC | O157 | 2013 | - | -                              | -        | -         |
| 98  | EH21 | STEC | O157 | 2013 | - | -                              | -        | -         |
| 99  | EH22 | STEC | O157 | 2013 | - | -                              | -        | -         |
| 100 | EH23 | STEC | O103 | 2013 | - | -                              | -        | -         |
| 101 | EH24 | STEC | O157 | 2013 | - | -                              | -        | -         |
| 102 | EH25 | STEC | O111 | 2013 | - | -                              | -        | -         |
| 103 | EH26 | STEC | O157 | 2013 | - | -                              | -        | -         |
| 104 | EH27 | STEC | O157 | 2013 | - | -                              | -        | -         |
| 105 | EH28 | STEC | O111 | 2013 | + | <i>dfrA12-aadA2</i>            | LC380552 | -         |
| 106 | EH29 | STEC | O157 | 2013 | - | -                              | -        | -         |
| 107 | EH30 | STEC | O157 | 2013 | - | -                              | -        | -         |
| 108 | EH31 | STEC | O157 | 2013 | - | -                              | -        | -         |
| 109 | EH32 | STEC | O157 | 2013 | - | -                              | -        | -         |
| 110 | EH33 | STEC | O157 | 2013 | - | -                              | -        | -         |
| 111 | EH34 | STEC | O145 | 2013 | - | -                              | -        | -         |
| 112 | EH35 | STEC | O157 | 2013 | - | -                              | -        | -         |
| 113 | EH36 | STEC | O157 | 2013 | - | -                              | -        | -         |
| 114 | EH37 | STEC | O157 | 2013 | - | -                              | -        | -         |
| 115 | EH38 | STEC | O157 | 2013 | - | -                              | -        | -         |
| 116 | EH39 | STEC | O157 | 2013 | - | -                              | -        | -         |
| 117 | EH40 | STEC | O145 | 2013 | + | <i>dfrA12-aadA2</i>            | LC380553 | -         |
| 118 | EH41 | STEC | O157 | 2013 | - | -                              | -        | -         |
| 119 | EH42 | STEC | O157 | 2013 | - | -                              | -        | -         |
| 120 | EH43 | STEC | O186 | 2014 | - | -                              | -        | -         |
| 121 | EH44 | STEC | O157 | 2014 | - | -                              | -        | -         |
| 122 | EH45 | STEC | O157 | 2014 | - | -                              | -        | -         |

|     |      |      |      |      |   |   |   |   |
|-----|------|------|------|------|---|---|---|---|
| 123 | EH46 | STEC | O26  | 2014 | - | - | - | - |
| 124 | EH47 | STEC | O157 | 2014 | - | - | - | - |
| 125 | EH48 | STEC | O157 | 2014 | - | - | - | - |
| 126 | EH49 | STEC | O157 | 2014 | - | - | - | - |
| 127 | EH50 | STEC | O157 | 2014 | - | - | - | - |
| 128 | EH51 | STEC | O157 | 2014 | - | - | - | - |
| 129 | EH52 | STEC | O157 | 2014 | - | - | - | - |
| 130 | EH53 | STEC | O157 | 2014 | - | - | - | - |
| 131 | EH54 | STEC | O157 | 2014 | - | - | - | - |
| 132 | EH55 | STEC | O157 | 2014 | - | - | - | - |
| 133 | EH56 | STEC | O157 | 2014 | - | - | - | - |
| 134 | EH57 | STEC | O157 | 2014 | - | - | - | - |
| 135 | EH58 | STEC | O157 | 2014 | - | - | - | - |
| 136 | EH59 | STEC | O26  | 2014 | - | - | - | - |
| 137 | EH60 | STEC | O157 | 2014 | - | - | - | - |
| 138 | EH61 | STEC | O26  | 2014 | - | - | - | - |
| 139 | EH62 | STEC | O157 | 2014 | - | - | - | - |
| 140 | EH63 | STEC | O103 | 2014 | - | - | - | - |
| 141 | EH64 | STEC | O157 | 2014 | - | - | - | - |
| 142 | EH65 | STEC | O157 | 2014 | - | - | - | - |
| 143 | EH66 | STEC | O157 | 2014 | - | - | - | - |
| 144 | EH67 | STEC | O111 | 2014 | - | - | - | - |
| 145 | EH68 | STEC | O157 | 2014 | - | - | - | - |
| 146 | EH69 | STEC | O26  | 2014 | - | - | - | - |
| 147 | EH70 | STEC | O157 | 2014 | - | - | - | - |
| 148 | EH71 | STEC | O157 | 2014 | - | - | - | - |
| 149 | EH72 | STEC | O157 | 2014 | - | - | - | - |
| 150 | EH73 | STEC | O157 | 2014 | - | - | - | - |
| 151 | EH74 | STEC | O157 | 2014 | - | - | - | - |
| 152 | EH75 | STEC | O157 | 2014 | - | - | - | - |
| 153 | EH76 | STEC | O157 | 2014 | - | - | - | - |
| 154 | EH77 | STEC | O157 | 2014 | - | - | - | - |
| 155 | EH78 | STEC | O157 | 2014 | - | - | - | - |
| 156 | EH79 | STEC | O157 | 2014 | - | - | - | - |
| 157 | EH80 | STEC | O157 | 2014 | - | - | - | - |
| 158 | EH81 | STEC | O157 | 2014 | - | - | - | - |
| 159 | EH82 | STEC | O103 | 2014 | - | - | - | - |
| 160 | EH83 | STEC | O157 | 2014 | - | - | - | - |
| 161 | ET1  | EPEC | O148 | 2013 | - | - | - | - |
| 162 | ET2  | EPEC | O169 | 2014 | - | - | - | - |
